# Supplementary material
Source: publisher figshare collection journal article supplement (https://karger.figshare.com/ndownloader/files/28249347)
Supplement: Supplementary file 1 [file 28249347]

Long term risk of autoimmune diseases other than systemic lupus erythematosus in cutaneous lupus erythematosus-alone patients: a 10-year nationwide cohort study

Short title: Risk of autoimmune diseases in cutaneous lupus erythematosus-alone patients

Teng-Li Lin, MD, 1 Chun-Ying Wu, MD, PhD, MPH, LL.M.,2-7 Chao-Kuei Juan, MD,1,2 Yun-Ting Chang, MD, PhD,2,8 Yi-Ju Chen MD, PhD,1,2,7*

| Supplementary table 2. Autoimmune diseases diagnosis in CLE-alone patients and reference subjects during 10 years of observation | | | |
| --- | --- | --- | --- |
|  | Case (N=971) | Control (N=5,175) | P-value |
| Systemic lupus erythematosus | 87 (8.96%) | 15 (0.29%) | <.001 |
| Non-SLE, overalla | 65 (6.9%) | 173 (3.40%) | <.001 |
| Sjogren’s syndrome | 25 (2.57%) | 24 (0.46%) | <.001 |
| Polymysitis/Dermatomyositis | 8 (0.82%) | 1 (0.02%) | <.001 |
| Graves’ disease | 6 (0.62%) | 29 (0.56%) | >.999 |
| Relapsing polychondritis | 5 (0.51%) | 7 (0.14%) | 0.039 |
| Dermatitis herpetiformis | 4 (0.41%) | 34 (0.66%) | 0.502 |
| Rheumatoid arthritis | 4 (0.41%) | 32 (0.62%) | 0.586 |
| Vitiligo | 4 (0.41%) | 27 (0.52%) | 0.844 |
| Pemphigus | 3 (0.31%) | 3 (0.06%) | 0.082 |
| Bullous pemphigoid | 2 (0.21%) | 4 (0.08%) | 0.536 |
| Linear morphea | 2 (0.21%) | 1 (0.02%) | 0.104 |
| Scleroderma | 2 (0.21%) | 1 (0.02%) | 0.104 |
| Hashimoto’s autoimmune thyroiditis | 2 (0.21%) | 7 (0.14%) | 0.943 |
| Autoimmune hemolytic anemia | 2 (0.21%) | 3 (0.06%) | 0.384 |
| HLA-B27-associated acute anterior uveitis | 2 (0.21%) | 2 (0.04%) | 0.234 |
| Pernicious anemia | 0 (0.00%) | 3 (0.06%) | >.999 |
| Myasthenia gravis | 0 (0.00%) | 6 (0.12%) | 0.616 |
| Primary biliary cirrhosis | 1 (0.10%) | 0 (0.00%) | 0.348 |
| Abbreviations: CLE, cutaneous lupus erythematosus; SLE, systemic lupus erythematosus.  aThe number of overall non-SLE autoimmune disease may not equal to the sum of each different autoimmune diseases listed below. Some of patients have more than 2 different autoimmune diseases. | | | |
